# Supplementary material
Source: Springer Nature journal article supplement (https://www.springermedizin.de/resource/supplementary/12974_2010_323_MOESM1_ESM.pdf/9601316)

**A**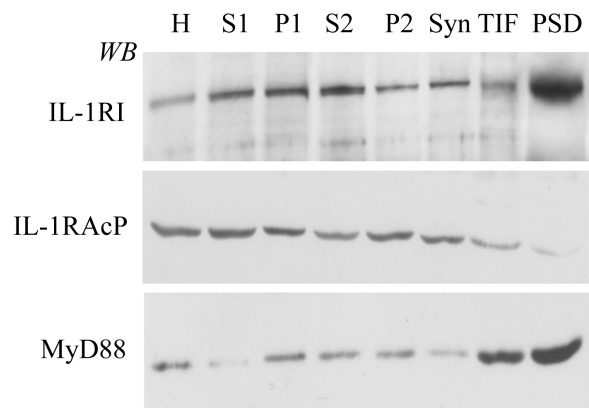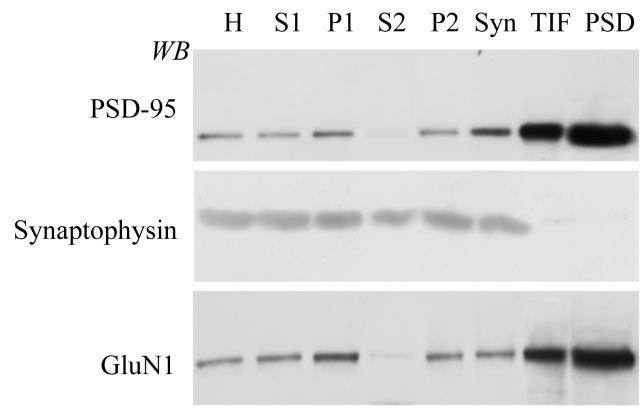**B**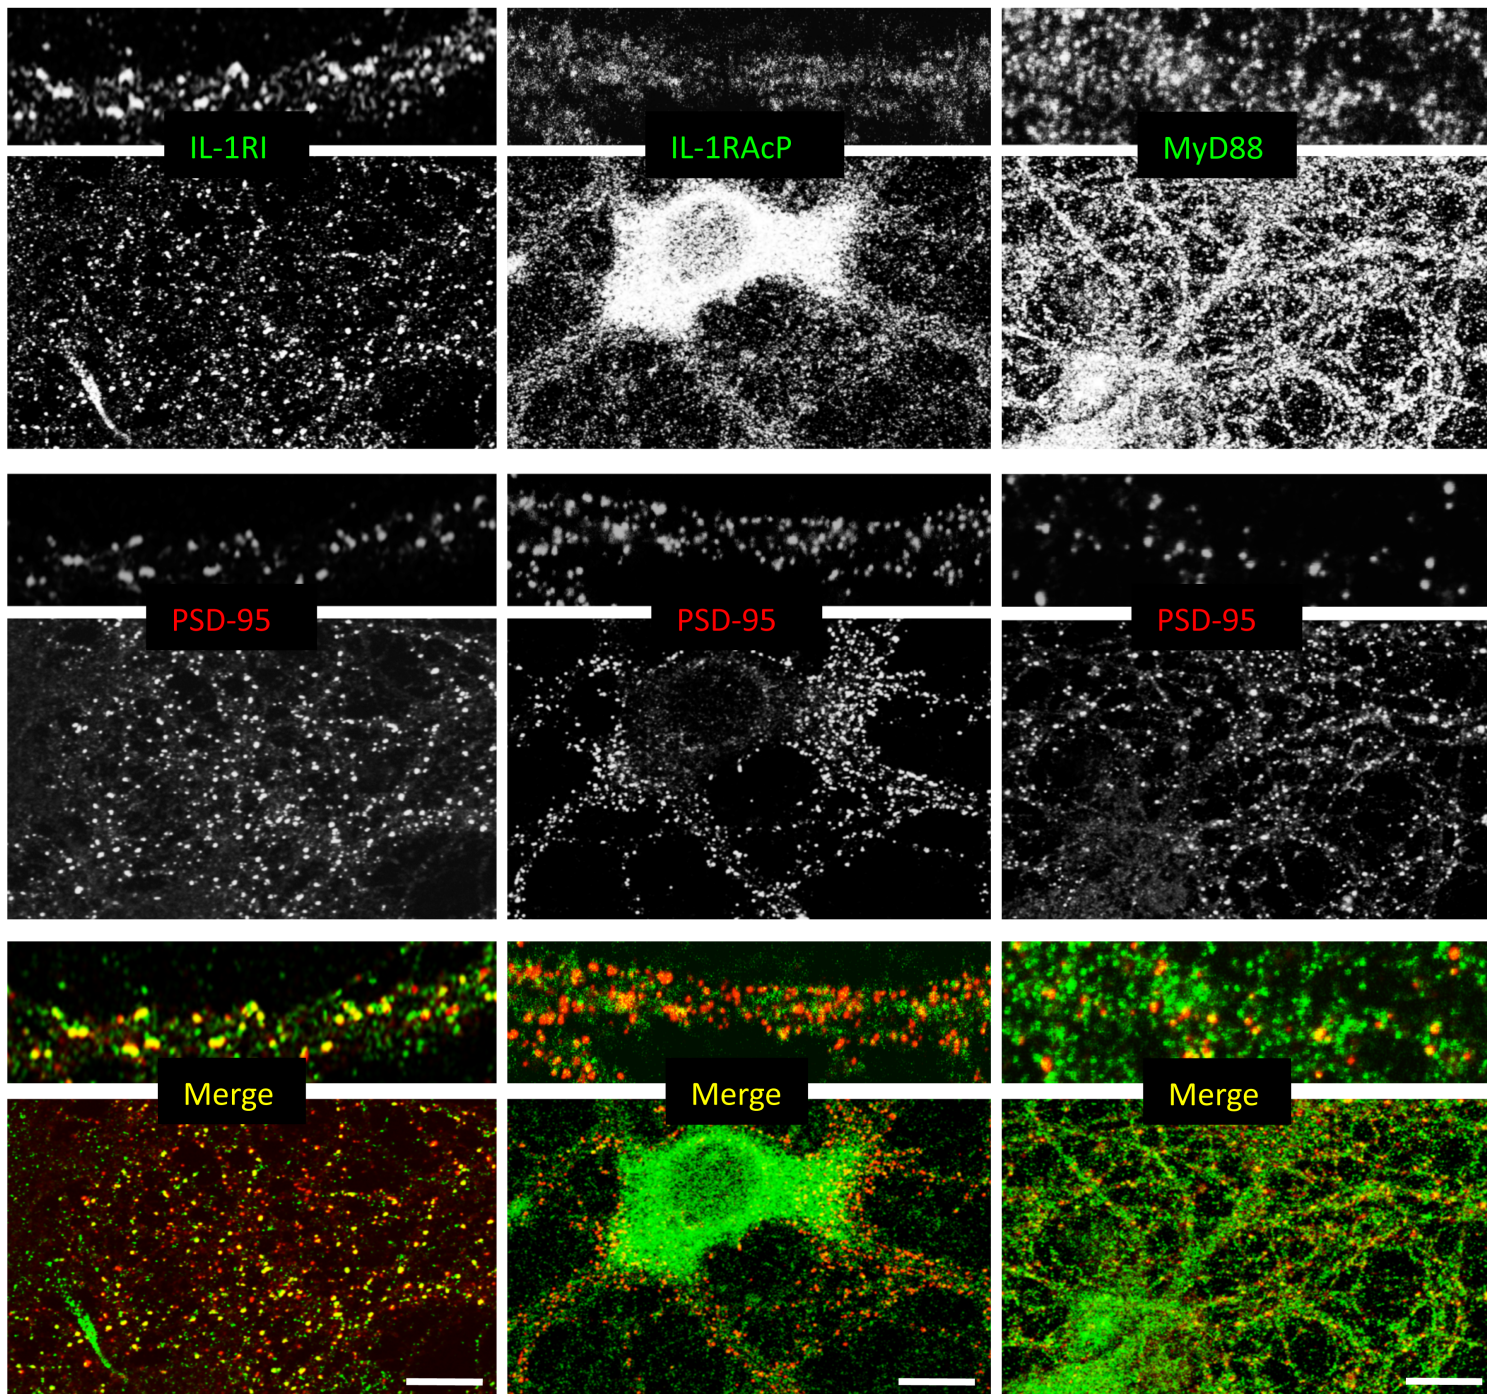

Supplement: MOESM1 [file 9601316]
